# Supplementary material
Source: HighWire-hosted journal article supplement (https://bmjopen.bmj.com/content/12/9/e065045)
Supplement: inline-supplementary-material-2 [file inline-supplementary-material-2.pdf]

**Appendix 2: Search strategy used on Medline.**

- 1 "Breast Cancer Lymphedema"[Mesh]
- 2 "Breast Cancer Lymphedema"
- 3 Breast Cancer Treatment-Related Lymphedema
- 4 or/1-3
- 5 "Low-Level Light Therapy"[Mesh]
- 6 "Low-Level Light Therapy"
- 7 LLLT
- 8 "Manual Lymphatic Drainage"[Mesh]
- 9 "Manual Lymphatic Drainage"
- 10 Intermittent Pneumatic Compression Pump
- 11 pneumatic compression pump
- 12 pneumatic compression
- 13 Complete Decongestive Therapy
- 14 Complex Decongestive Therapy
- 15 "Athletic Tape"[Mesh]
- 16 "Athletic Tape"
- 17 Kinesio taping
- 18 linfortaping
- 19 "Yoga"[Mesh]
- 20 "Yoga"
- 21 "Exercise Movement Techniques"[Mesh]
- 22 Pilates Training
- 23 "Extracorporeal Shockwave Therapy"[Mesh]
- 24 "Extracorporeal Shockwave Therapy"
- 25 "Exercise Therapy"[Mesh]
- 26 "Exercise Therapy"
- 27 "Resistance Training"[Mesh]
- 28 "Resistance Training"
- 29 strength training
- 30 Weigth Lifting Excercise Program
- 31 Weigth Lifting Exercise Program
- 32 weight lifting exercise
- 33 Weigth Lifting Exercise
- 34 aerobic training
- 35 endurance training
- 36 "Aquatic Therapy"[Mesh]
- 37 "Aquatic Therapy"
- 38 or/5-37
- 39 clinical[Title/Abstract]
- 40 trial[Title/Abstract]
- 41 clinical trials as topic[MeSH Terms]

42 clinical trial[Publication Type]  
43 random\*[Title/Abstract]  
44 random allocation[MeSH Terms]  
45 therapeutic use[MeSH Subheading]  
46 or/39-45  
47 and/4,38, 46

### Search strategy used on Lilacs:

1 linfedema del cáncer de mama  
2 linfedema posmastectomía  
3 linfedema relacionado con el tratamiento del cáncer de mama  
4 or/1-3  
5 terapia por luz de baja intensidad  
6 bioestimulación por láser  
7 lilt  
8 drenaje linfático manual  
9 masaje de drenaje linfático  
10 aparatos de compresión neumática intermitente  
11 media de compresión neumática  
12 terapia descongestiva completa  
13 cinta atlética  
14 kinesio tape  
15 vendaje neuromuscular  
16 técnicas de ejercicio con movimiento  
17 método pilates  
18 ejercicio físico  
19 terapia por ejercicio  
20 tratamiento con ondas de choque extracorpóreas  
21 tratamiento con ondas de choque  
22 entrenamiento de fuerza  
23 programa de fortalecimiento levantando peso  
24 musculación  
25 entrenamiento aeróbico  
26 entrenamiento de resistencia  
27 (balneoterapia)  
28 or/5-26  
29 and/4,28  
30 Filtro: type\_of\_study:(*"clinical\_trials"*)

**Search strategy used on Medline CINHAL:**

1 "breast cancer lymphedema"  
2 "breast cancer-related lymphedema"  
3 "Breast Cancer Treatment-Related Lymphedema"  
4 or/1-3  
5 "Complete Decongestive Therapy"  
6 "Manual Lymphatic Drainage"  
7 "Low-level laser therapy"  
8 "Low-level light therapy"  
9 "Pneumatic pumps"  
10 "Pneumatic compression pumps"  
11 Kinesio-taping  
12 linfortaping  
13 "High intensity endurance training"  
14 "Moderate intensity endurance training"  
15 "Low intensity endurance training"  
16 "Supervised endurance training"  
17 "Unsupervised endurance training"  
18 "Supervised aerobic training"  
19 "Unsupervised aerobic training"  
20 "Weight lifting exercise"  
21 pilates  
22 yoga  
23 "Exercise Movement Techniques"  
24 "shock waves"  
25 "High-Energy shock waves"  
26 "Endurance training"  
27 "aerobic training"  
28 "Endurance training"  
29 "water aerobics training"  
30 "Endurance training"  
31 "aerobic training"  
32 Stretching  
33 or/5-32  
34 "randomized clinical trial"  
35 and/4,33,34

**Search strategy used on Embase:**

1 'breast cancer lymphedema'/exp  
2 'breast cancer treatment-related lymphedema'  
3 or/1,2  
4 'low-level light therapy'/exp  
5 lllt:ab,ti  
6 'manual lymphatic drainage'/exp  
7 'intermittent pneumatic compression pump'  
8 'complete decongestive therapy'/exp  
9 'athletic tape'/exp  
10 'kinesio taping'/exp  
11 linfotaping  
12 'yoga'/exp  
13 'exercise movement techniques'/exp  
14 'pilates training'  
15 'extracorporeal shockwave therapy'/exp  
16 'resistance training'/exp  
17 'weight lifting exercise'/exp  
18 'aerobic training'/exp  
19 'endurance training'/exp  
20 'exercise therapy'/exp  
21 'aquatic therapy'/exp  
22 OR/4-21  
23 and/3,22  
24 Filter: [randomized controlled trial]/lim

**Search strategy used on PEDro:**Advanced Search:**Abstract & Title:** 'breast cancer lymphedema'**Therapy:** -**Problem:** -**Body Part:** upper arm, shoulder or shoulder girdle**Subdiscipline:** -**Topic:** -**Method:** clinical trial**Author/Association:** -**Title Only:** -**Source:** -**Published Since:** -**New records added since:** -**Score at least:** -**When Searching:** Match all search term (AND)

**Search strategy used on CENTRAL:****Search #1**

- 1 "breast cancer lymphedema"
- 2 "breast cancer-related lymphedema"
- 3 "Breast Cancer Treatment-Related Lymphedema"
- 4 or/1-3
- 5 "Pneumatic pumps" OR "Pneumatic compression pumps"
- 6 "Low-level light therapy"
- 7 "Low-level laser therapy"
- 8 "Complete Decongestive Therapy"
- 9 "Manual Lymphatic Drainage"
- 10 or/5-9
- 11 randomized clinical trial
- 12 and/4,10,11

**Search #2**

- 1 "breast cancer lymphedema"
- 2 "breast cancer-related lymphedema"
- 3 "Breast Cancer Treatment-Related Lymphedema"
- 4 or/1-3
- 5 Kinesio-taping
- 6 linfortaping
- 7 "Weight lifting"
- 8 or/5-7
- 9 randomized clinical trial
- 10 and/4,8,9

**Search #3**

- 1 "breast cancer lymphedema"
- 2 "breast cancer-related lymphedema"
- 3 "Breast Cancer Treatment-Related Lymphedema"
- 4 or/1-3
- 5 "High intensity endurance training"
- 6 "Moderate intensity endurance training"
- 7 "Low intensity endurance training"
- 8 "Supervised endurance training"
- 9 "Unsupervised endurance training"
- 10 "Supervised aerobic training"
- 11 "Unsupervised aerobic training"
- 12 or/5-11
- 13 randomized clinical trial

14 and/4,12,13

**Search #4**

1 "breast cancer lymphedema"  
2 "breast cancer-related lymphedema"  
3 "Breast Cancer Treatment-Related Lymphedema"  
4 or/1-3  
5 pilates  
6 yoga  
7 "shock waves"  
8 "High-Energy shock waves"  
9 "Exercise Movement Techniques"  
10 or/5-9  
11 randomized clinical trial  
12 and/4,10,11

**Search #5**

1 "breast cancer lymphedema"  
2 "breast cancer-related lymphedema"  
3 "Breast Cancer Treatment-Related Lymphedema"  
4 or/1-3  
5 "Endurance training"  
6 "aerobic training"  
7 "water aerobics training"  
8 stretching  
9 and/5,6  
10 and/5,7  
11 and/5,6,8  
12 or/9,10,11  
13 randomized clinical trial  
14 and/12,13
